# Supplementary material
Source: Research Square preprint supplement (doi:10.21203/rs.3.rs-7012736/v1)
Supplement: Supplementary file 1 [file ff9157981248e2ae8c1a3b04.docx]

**Supplemental materials**

**The dual role of the C4 proteins and consequences in first-episode psychosis**

**Authors: Shokouh Arjmand1,2*, Samudyata1, Fredrik Piehl3, Aurimantas Pelanis4, Göran Engberg1,5, Simon Cervenka6,7, Mikael Landén 8,9, Sophie Erhardt1, Carl M. Sellgren1,6***

1 *Department of Physiology and Pharmacology, Karolinska Institutet, Stockholm, Sweden*

*2 Department of Clinical Medicine, Translational Neuropsychiatry Unit, Aarhus University, Aarhus, Denmark*

3 *Neuroimmunology Unit, Department of Clinical Neuroscience, Karolinska Institutet, and Neuro Division, Karolinska University Hospital, Stockholm, Sweden*

4 *Department of Anesthesiology, Sahlgrenska University Hospital, Gothenburg, Sweden*

*5 Institute of Sport Science and Innovations, Lithuanian Sports University, Kaunas, Lithuania*

*6 Centre for Psychiatry Research, Department of Clinical Neuroscience, Karolinska Institutet & Stockholm Health Care Services, Region Stockholm, Sweden*

*7 Department of Medical Sciences, Psychosis Research and Preventive Psychiatry, Uppsala University, Uppsala, Sweden*

*8 Institute of Neuroscience and Physiology, University of Gothenburg, Gothenburg, Sweden*

*9 Department of Medical Epidemiology and Biostatistics, Karolinska Institutet, Stockholm, Sweden*

*Correspondence to: Shokouh Arjmand ([shokouh.arjmand@ki.se](mailto:shokouh.arjmand@ki.se)) & Carl M. Sellgren ([carl.sellgren@ki.se](mailto:carl.sellgren@ki.se))

C3 Fysiologi och farmakologi, C3 FyFa Cellulär modellering av psykiatriska sjukdomar, 171 77 Stockholm

| Table S1: *Demographic and clinical characteristics of the participants* | | | | | | | | | | | | | | | | | | | | | | |
| --- | --- | --- | --- | --- | --- | --- | --- | --- | --- | --- | --- | --- | --- | --- | --- | --- | --- | --- | --- | --- | --- | --- |
|  | | | | | | | | | | | | | | | | | 95% Confidence Interval Std. Dev. | | | | | |
|  | |  | | | Valid | | | p values | | | Mean | | | Std. Deviation | | | Lower | | | Upper | | |
| Sex (F/M) |  | | HCs |  | | 90 (42/48) |  | | 0.136 |  | | - |  | | - |  | | - |  | | - |  | |
|  |  | | FEPs |  | | 113 (41/72) |  | |  |  | | - |  | | - |  | | - |  | | - |  | |
|  |  | |  |  | |  |  | |  |  | |  |  | |  |  | |  |  | |  |  | |
| Age |  | | HCs |  | | 90 |  | | 0.006 |  | | 37.66 |  | | 14.22 |  | | 12.40 |  | | 16.67 |  | |
|  |  | | FEPs |  | | 113 |  | |  |  | | 31.94 |  | | 10.03 |  | | 8.87 |  | | 11.54 |  | |
|  |  | |  |  | |  |  | |  |  | |  |  | |  |  | |  |  | |  |  | |
| BMI (kg/m2) |  | | HCs |  | | 88 |  | | 0.920 |  | | 24.68 |  | | 3.58 |  | | 3.11 |  | | 4.20 |  | |
|  |  | | FEPs |  | | 111 |  | |  |  | | 24.69 |  | | 4.25 |  | | 3.76 |  | | 4.90 |  | |
|  |  | |  |  | |  |  | |  |  | |  |  | |  |  | |  |  | |  |  | |
| Nicotine use |  | | HCs |  | | 88 (15/88) |  | | 0.020 |  | | - |  | | - |  | | - |  | | - |  | |
|  |  | | FEPs |  | | 87 (29/87) |  | |  |  | | - |  | | - |  | | - |  | | - |  | |
|  |  | |  |  | |  |  | |  |  | |  |  | |  |  | |  |  | |  |  | |
| PANSS Positive |  | | HCs |  | | NA |  | |  |  | |  |  | |  |  | |  |  | |  |  | |
|  |  | | FEPs |  | | 90 |  | |  |  | | 17.61 |  | | 6.12 |  | | 5.34 |  | | 7.180 |  | |
|  |  | |  |  | |  |  | |  |  | |  |  | |  |  | |  |  | |  |  | |
| PANSS Negative |  | | HCs |  | | NA |  | |  |  | |  |  | |  |  | |  |  | |  |  | |
|  |  | | FEPs |  | | 90 |  | |  |  | | 16.50 |  | | 6.59 |  | | 5.75 |  | | 7.73 |  | |
|  |  | |  |  | |  |  | |  |  | |  |  | |  |  | |  |  | |  |  | |
| PANSS General |  | | HCs |  | | NA |  | |  |  | |  |  | |  |  | |  |  | |  |  | |
|  |  | | FEPs |  | | 90 |  | |  |  | | 35.99 |  | | 10.48 |  | | 9.15 |  | | 12.29 |  | |
|  |  | |  |  | |  |  | |  |  | |  |  | |  |  | |  |  | |  |  | |
| PANSS Total |  | | HCs |  | | NA |  | |  |  | |  |  | |  |  | |  |  | |  |  | |
|  |  | | FEPs |  | | 90 |  | |  |  | | 70.10 |  | | 18.99 |  | | 16.56 |  | | 22.26 |  | |
|  |  | |  |  | |  |  | |  |  | |  |  | |  |  | |  |  | |  |  | |
| GAF-S |  | | HCs |  | | 52 |  | |  |  | | 84.58 |  | | 7.71 |  | | 6.46 |  | | 9.56 |  | |
|  |  | | FEPs |  | | 67 |  | |  |  | | 33.63 |  | | 10.34 |  | | 8.84 |  | | 12.47 |  | |
|  |  | |  |  | |  |  | |  |  | |  |  | |  |  | |  |  | |  |  | |
| GAF-F |  | | HCs |  | | 52 |  | |  |  | | 85.11 |  | | 7.17 |  | | 6.01 |  | | 8.89 |  | |
|  |  | | FEPs |  | | 67 |  | |  |  | | 41.82 |  | | 13.07 |  | | 11.17 |  | | 15.75 |  | |
|  |  | |  |  | |  |  | |  |  | |  |  | |  |  | |  |  | |  |  | |
| CGI |  | | HCs |  | | NA |  | |  |  | |  |  | |  |  | |  |  | |  |  | |
|  |  | | FEPs |  | | 72 |  | |  |  | | 4.53 |  | | 1.20 |  | | 1.03 |  | | 1.43 |  | |
|  |  | |  |  | |  |  | |  |  | |  |  | |  |  | |  |  | |  |  | |
| DUP (Months) |  | | HCs |  | | NA |  | |  |  | |  |  | |  |  | |  |  | |  |  | |
|  |  | | FEPs |  | | 58 |  | |  |  | | 11.26 |  | | 17.85 |  | | 15.09 |  | | 21.86 |  | |
|  |  | |  |  | |  |  | |  |  | |  |  | |  |  | |  |  | |  |  | |
|  |  | |  |  | |  |  | |  |  | |  |  | |  |  | |  |  | |  |  | |
|  | | | | | | | | | | | | | | | | | | | | | | |

PANSS: Positive and Negative Syndrome Scale; GAF: Global Assessment of Functioning (Symptoms and Function); CGI: Clinical Global Impression; DUP: Duration of Psychosis; NA: Not Applicable

Figure S1


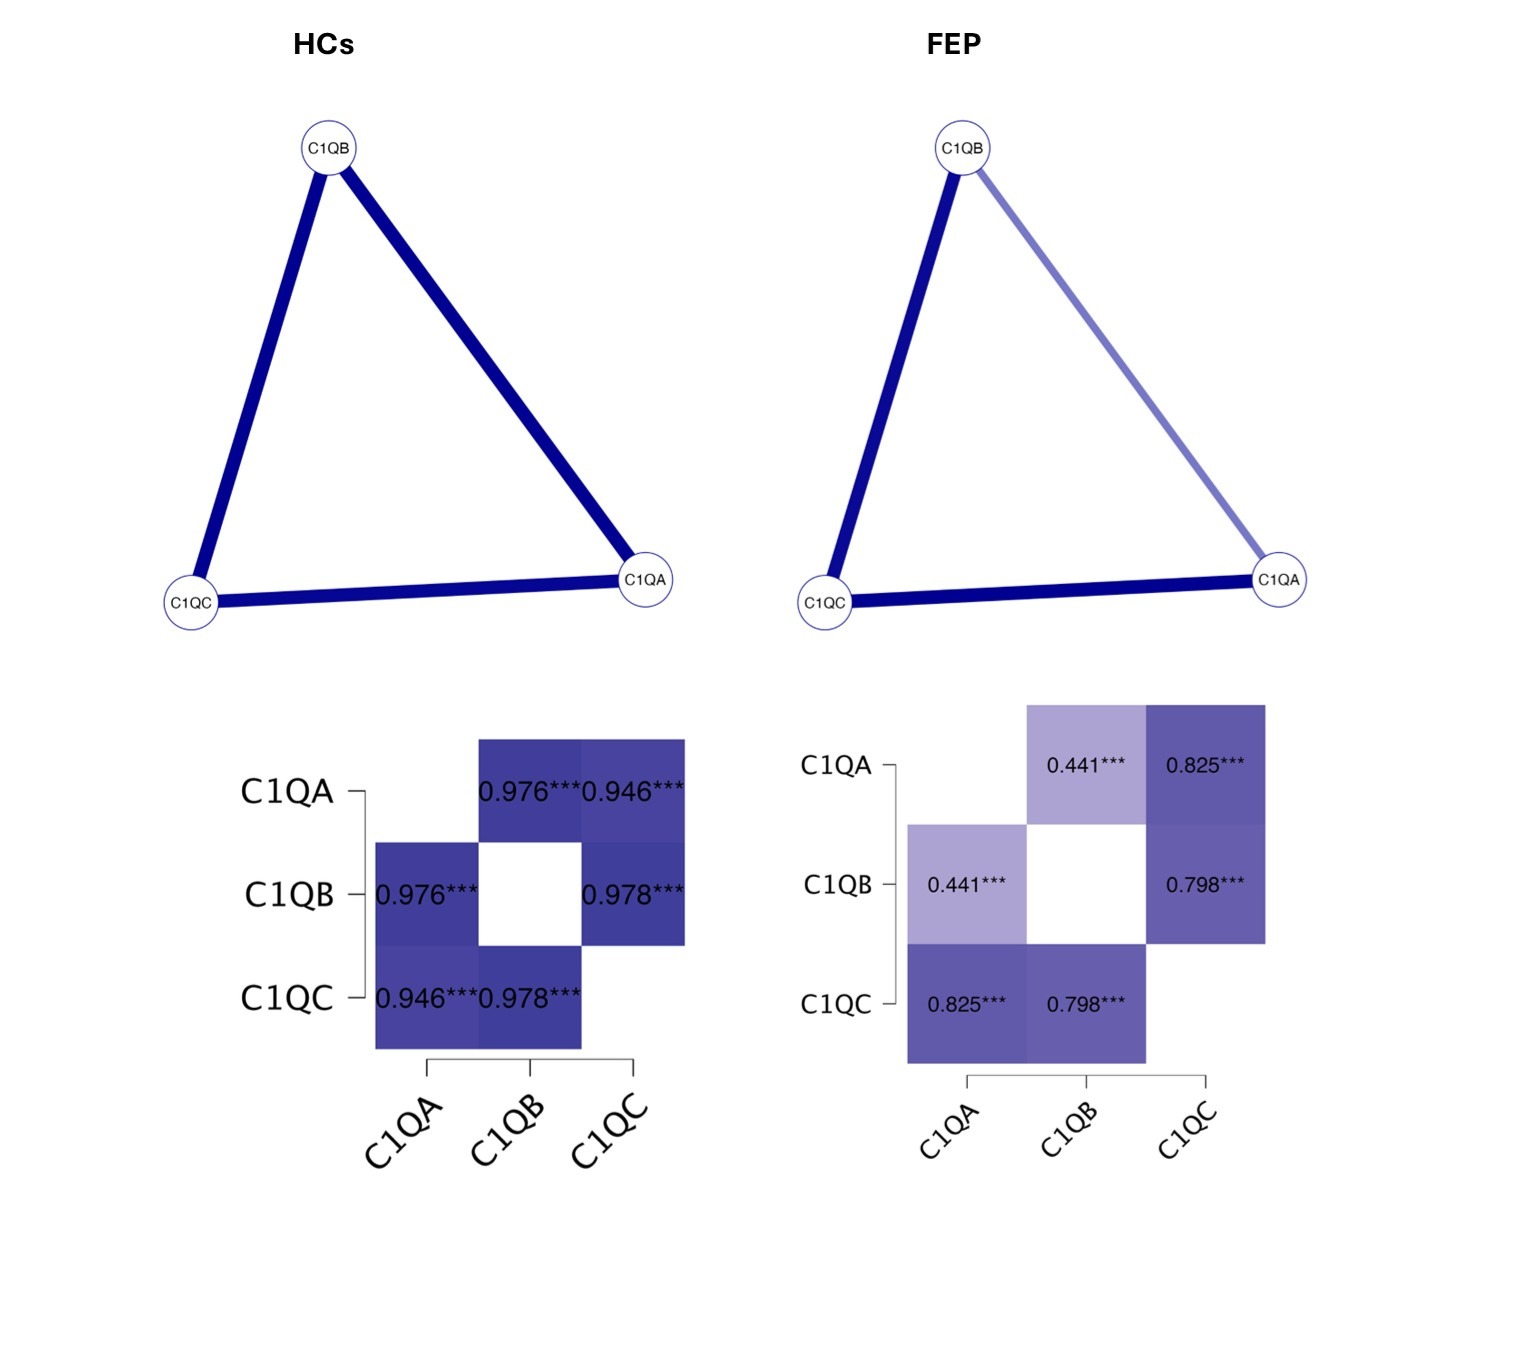


**Fig. S1** | Network analyses and correlation matrices of the associations between CSF protein levels of C1QA, C1QB, and C1QC in healthy controls (HCs) and first-episode psychosis (FEP) patients adjusted for sex, age, and BMI.

In HCs, C1Q subtypes exhibit strong inter-correlations. Although the correlations remain statistically significant in FEP patients, their strength is comparatively reduced (strong for C1QA-C1QC as well as C1QB-C1QC, and moderate for C1QA-C1QB).

Figure S2

**Fig. S2** | Correlation matrices of the associations between CSF protein levels of complement factors with sex, age, and BMI.
